# Supplementary material for: Mycorrhiza Reduces Adverse Effects of Dark Septate Endophytes (DSE) on Growth of Conifers
Source: PubMed Central journal article supplement (PMC3416760; doi:10.1371/journal.pone.0042865), 2012-08-10
Supplement: pone.0042865.s001.pdf [file pone.0042865.s001.pdf]

**Table S1.** Factors in the full and reduced models with plant biomass as response variable. The stepAIC command implemented in R was used to find the reduced models. Values are given for models including both hosts and with the two hosts separately. Significance level  $\leq 0.05$ ; \*\*\*,  $0 \leq p \leq 0.001$ ; \*\*,  $0.001 < p \leq 0.01$ ; \*,  $0.01 < p \leq 0.05$

**Both Hosts**

| <i>Full Model</i> | <b>Factors</b>                                  | <b>Df</b> | <b>Sum Sq</b> | <b>Mean Sq</b> | <b>F value</b> | <b>Pr(&gt;F)</b> |     |
|-------------------|-------------------------------------------------|-----------|---------------|----------------|----------------|------------------|-----|
|                   | PAC strain                                      | 3         | 0.12386       | 0.04129        | 7.2482         | 0.000127         | *** |
|                   | Temperature                                     | 1         | 0.72964       | 0.72964        | 128.099        | < 2.2e-16        | *** |
|                   | Mycorrization                                   | 1         | 0.72782       | 0.72782        | 127.7801       | < 2.2e-16        | *** |
|                   | Host                                            | 1         | 1.61431       | 1.61431        | 283.4182       | < 2.2e-16        | *** |
|                   | Block                                           | 1         | 0.01729       | 0.01729        | 3.0358         | 0.0831173        | .   |
|                   | PAC strain:Temperature                          | 3         | 0.04487       | 0.01496        | 2.6256         | 0.0518466        | .   |
|                   | PAC strain:Mycorrization                        | 3         | 0.0421        | 0.01403        | 2.4637         | 0.0638824        | .   |
|                   | Temperature:Mycorrization                       | 1         | 0.00186       | 0.00186        | 0.3259         | 0.568795         |     |
|                   | PAC strain:Host                                 | 3         | 0.03875       | 0.01292        | 2.2677         | 0.0821568        | .   |
|                   | Temperature:Host                                | 1         | 0.8131        | 0.8131         | 142.7517       | < 2.2e-16        | *** |
|                   | Mycorrization:Host                              | 1         | 0.15068       | 0.15068        | 26.4551        | 6.87E-07         | *** |
|                   | PAC strain:Block                                | 3         | 0.0065        | 0.00217        | 0.3805         | 0.767155         |     |
|                   | Temperature:Block                               | 1         | 0.00138       | 0.00138        | 0.2427         | 0.6228609        |     |
|                   | Mycorrization:Block                             | 1         | 0.00001       | 0.00001        | 0.0013         | 0.9709123        |     |
|                   | Host:Block                                      | 1         | 0.00005       | 0.00005        | 0.0096         | 9.22E-01         |     |
|                   | PAC strain:Temperature:Mycorrization            | 3         | 0.0489        | 0.0163         | 2.8619         | 0.0381878        | *   |
|                   | PAC strain:Temperature:Host                     | 3         | 0.03429       | 0.01143        | 2.0069         | 0.1145541        |     |
|                   | PAC strain:Mycorrization:Host                   | 3         | 0.03547       | 0.01182        | 2.0755         | 0.1049871        |     |
|                   | Temperature:Mycorrization:Host                  | 1         | 0.09942       | 0.09942        | 17.4553        | 4.54E-05         | *** |
|                   | PAC strain:Temperature:Block                    | 3         | 0.02251       | 0.0075         | 1.3172         | 0.2702092        |     |
|                   | PAC strain:Mycorrization:Block                  | 3         | 0.0158        | 0.00527        | 0.9247         | 0.429994         |     |
|                   | Temperature:Mycorrization:Block                 | 1         | 0.01454       | 0.01454        | 2.5527         | 0.1118189        |     |
|                   | PAC strain:Host:Block                           | 3         | 0.00562       | 0.00187        | 0.3289         | 0.8044622        |     |
|                   | Temperature:Host:Block                          | 1         | 0.02223       | 0.02223        | 3.9029         | 0.0496988        | *   |
|                   | Mycorrization:Host:Block                        | 1         | 0.00191       | 0.00191        | 0.3347         | 5.64E-01         |     |
|                   | PAC strain:Temperature:Mycorrization:Host       | 3         | 0.06314       | 0.02105        | 3.695          | 0.0128992        | *   |
|                   | PAC strain:Temperature:Mycorrization:Block      | 3         | 0.02819       | 0.0094         | 1.6498         | 0.1794719        |     |
|                   | PAC strain:Temperature:Host:Block               | 3         | 0.00179       | 0.0006         | 0.1045         | 0.9573613        |     |
|                   | PAC strain:Mycorrization:Host:Block             | 3         | 0.01307       | 0.00436        | 0.7646         | 0.5152255        |     |
|                   | Temperature:Mycorrization:Host:Block            | 1         | 0.00238       | 0.00238        | 0.4175         | 0.5190053        |     |
|                   | PAC strain:Temperature:Mycorrization:Host:Block | 3         | 0.00289       | 0.00096        | 0.1689         | 0.9172679        |     |

| <i>Reduced Model</i> | <b>Factors</b>                              | <b>Df</b> | <b>Sum Sq</b> | <b>Mean Sq</b> | <b>F value</b> | <b>Pr(&gt;F)</b> |     |
|----------------------|---------------------------------------------|-----------|---------------|----------------|----------------|------------------|-----|
|                      | PAC strain                                  | 3         | 0.12386       | 0.04129        | 7.4982         | 8.96E-03         | *** |
|                      | Temperature                                 | 1         | 0.72964       | 0.72964        | 132.5175       | < 2.2e-16        | *** |
|                      | Mycorrhization                              | 1         | 0.72782       | 0.72782        | 132.1875       | < 2.2e-16        | *** |
|                      | Host                                        | 1         | 1.61431       | 1.61431        | 293.194        | < 2.2e-16        | *** |
|                      | Block                                       | 1         | 0.01729       | 0.01729        | 3.1405         | 0.07794          | .   |
|                      | PAC strain:Temperature                      | 3         | 0.04487       | 0.01496        | 2.7162         | 0.04596          | *   |
|                      | PAC strain:Mycorrhization                   | 3         | 0.0421        | 0.01403        | 2.5487         | 0.05709          | .   |
|                      | Temperature:Mycorrhization                  | 1         | 0.00186       | 0.00186        | 0.3371         | 0.56217          | .   |
|                      | PAC strain:Host                             | 3         | 0.03875       | 0.01292        | 2.3459         | 0.07413          | .   |
|                      | Temperature:Host                            | 1         | 0.8131        | 0.8131         | 147.6756       | < 2.2e-16        | *** |
|                      | Mycorrhization:Host                         | 1         | 0.15068       | 0.15068        | 27.3676        | 4.34E-05         | *** |
|                      | PAC strain:Block                            | 3         | 0.0065        | 0.00217        | 0.3937         | 0.75771          | .   |
|                      | Temperature:Block                           | 1         | 0.00138       | 0.00138        | 0.2511         | 0.6169           | .   |
|                      | Mycorrhization:Block                        | 1         | 0.00001       | 0.00001        | 0.0014         | 0.97041          | .   |
|                      | Host:Block                                  | 1         | 0.00005       | 0.00005        | 0.0099         | 0.92077          | .   |
|                      | PAC strain:Temperature:Mycorrhization       | 3         | 0.0489        | 0.0163         | 2.9606         | 0.03346          | *   |
|                      | PAC strain:Temperature:Host                 | 3         | 0.03429       | 0.01143        | 2.0761         | 0.10471          | .   |
|                      | PAC strain:Mycorrhization:Host              | 3         | 0.03547       | 0.01182        | 2.1471         | 0.09564          | .   |
|                      | Temperature:Mycorrhization:Host             | 1         | 0.09942       | 0.09942        | 18.0574        | 3.33E-03         | *** |
|                      | PAC strain:Temperature:Block                | 3         | 0.02251       | 0.0075         | 1.3626         | 0.25551          | .   |
|                      | PAC strain:Mycorrhization:Block             | 3         | 0.0158        | 0.00527        | 0.9566         | 0.41436          | .   |
|                      | Temperature:Mycorrhization:Block            | 1         | 0.01454       | 0.01454        | 2.6408         | 0.10578          | .   |
|                      | PAC strain:Host:Block                       | 3         | 0.00562       | 0.00187        | 0.3402         | 0.79625          | .   |
|                      | Temperature:Host:Block                      | 1         | 0.02223       | 0.02223        | 4.0375         | 0.04589          | *   |
|                      | Mycorrhization:Host:Block                   | 1         | 0.00191       | 0.00191        | 0.3463         | 0.55692          | .   |
|                      | PAC strain:Temperature:Mycorrhization:Host  | 3         | 0.06314       | 0.02105        | 3.8225         | 0.01084          | *   |
|                      | PAC strain:Temperature:Mycorrhization:Block | 3         | 0.02819       | 0.0094         | 1.7067         | 0.16697          | .   |
|                      | Residuals                                   | 194       | 1.06816       | 0.00551        |                |                  |     |

---

**Douglas-Fir**

| <i>Full Model</i> | <b>Factors</b>                              | <b>Df</b> | <b>Sum Sq</b> | <b>Mean Sq</b> | <b>F value</b> | <b>Pr(&gt;F)</b> |     |
|-------------------|---------------------------------------------|-----------|---------------|----------------|----------------|------------------|-----|
|                   | Temperature                                 | 1         | 0.0013        | 0.001304       | 0.1563         | 0.693573         |     |
|                   | PAC strain                                  | 3         | 0.03983       | 0.013277       | 1.5907         | 0.197344         |     |
|                   | Mycorrhization                              | 1         | 0.21128       | 0.21128        | 25.3129        | 2.56E-06         | *** |
|                   | Block                                       | 1         | 0.01463       | 0.01463        | 1.7528         | 0.188957         |     |
|                   | Temperature:PAC strain                      | 3         | 0.03225       | 0.010749       | 1.2878         | 0.283618         |     |
|                   | Temperature:Mycorrhization                  | 1         | 0.10229       | 0.102285       | 12.2545        | 0.000731         | *** |
|                   | PAC strain:Mycorrhization                   | 3         | 0.00463       | 0.001543       | 0.1848         | 0.906449         |     |
|                   | Temperature:Block                           | 1         | 0.01885       | 0.01885        | 2.2583         | 0.136477         |     |
|                   | PAC strain:Block                            | 3         | 0.00192       | 0.000639       | 0.0765         | 0.972497         |     |
|                   | Mycorrhization:Block                        | 1         | 0.00159       | 0.001588       | 0.1903         | 0.663758         |     |
|                   | Temperature:PAC strain:Mycorrhization       | 3         | 0.01085       | 0.003617       | 0.4333         | 0.729667         |     |
|                   | Temperature:PAC strain:Block                | 3         | 0.01929       | 0.006431       | 0.7705         | 0.513557         |     |
|                   | Temperature:Mycorrhization:Block            | 1         | 0.0046        | 0.004601       | 0.5512         | 0.459798         |     |
|                   | PAC strain:Mycorrhization:Block             | 3         | 0.03346       | 0.011152       | 1.3361         | 0.267805         |     |
|                   | Temperature:PAC strain:Mycorrhization:Block | 3         | 0.03652       | 0.012175       | 1.4586         | 0.231357         |     |
|                   | Residuals                                   | 88        | 0.73451       | 0.008347       |                |                  |     |

| <i>Reduced Model</i> | <b>Factors</b>             | <b>Df</b> | <b>Sum Sq</b> | <b>Mean Sq</b> | <b>F value</b> | <b>Pr(&gt;F)</b> |     |
|----------------------|----------------------------|-----------|---------------|----------------|----------------|------------------|-----|
|                      | Temperature                | 1         | 0.0013        | 0.001304       | 0.163          | 0.6871897        |     |
|                      | Mycorrhization             | 1         | 0.21536       | 0.215359       | 26.9089        | 9.37E-07         | *** |
|                      | Block                      | 1         | 0.01235       | 0.012354       | 1.5436         | 0.2166296        |     |
|                      | Temperature:Mycorrhization | 1         | 0.10695       | 0.10695        | 13.3633        | 0.0003896        | *** |
|                      | Temperature:Block          | 1         | 0.01946       | 0.019461       | 2.4316         | 0.1216809        |     |
|                      | Residuals                  | 114       | 0.91237       | 0.008003       |                |                  |     |

Picea

| <i>Full Model</i> | Factors                                     | Df | Sum Sq  | Mean Sq | F value  | Pr(>F)    |     |
|-------------------|---------------------------------------------|----|---------|---------|----------|-----------|-----|
|                   | Temperature                                 | 1  | 2.02066 | 2.02066 | 249.1859 | < 2.2e-16 | *** |
|                   | PAC strain                                  | 3  | 0.19898 | 0.06633 | 8.1795   | 6.64E-05  | *** |
|                   | Mycorrhization                              | 1  | 0.84077 | 0.84077 | 103.683  | < 2.2e-16 | *** |
|                   | Block                                       | 1  | 0.02822 | 0.02822 | 3.48     | 0.065169  | .   |
|                   | Temperature:PAC strain                      | 3  | 0.06369 | 0.02123 | 2.618    | 0.055339  | .   |
|                   | Temperature:Mycorrhization                  | 1  | 0.00878 | 0.00878 | 1.0833   | 0.300568  |     |
|                   | PAC strain:Mycorrhization                   | 3  | 0.13295 | 0.04432 | 5.4652   | 0.001642  | **  |
|                   | Temperature:Block                           | 1  | 0.01086 | 0.01086 | 1.3391   | 0.250073  |     |
|                   | PAC strain:Block                            | 3  | 0.01864 | 0.00621 | 0.7664   | 0.515619  |     |
|                   | Mycorrhization:Block                        | 1  | 0.00011 | 0.00011 | 0.0134   | 0.908077  |     |
|                   | Temperature:PAC strain:Mycorrhization       | 3  | 0.13205 | 0.04402 | 5.428    | 0.001718  | **  |
|                   | Temperature:PAC strain:Block                | 3  | 0.01128 | 0.00376 | 0.4638   | 0.708197  |     |
|                   | Temperature:Mycorrhization:Block            | 1  | 0.00946 | 0.00946 | 1.1671   | 0.282712  |     |
|                   | PAC strain:Mycorrhization:Block             | 3  | 0.00949 | 0.00316 | 0.3899   | 0.760525  |     |
|                   | Temperature:PAC strain:Mycorrhization:Block | 3  | 0.02375 | 0.00792 | 0.9762   | 0.407351  |     |
|                   | Residuals                                   | 96 | 0.77847 | 0.00811 |          |           |     |

| <i>Reduced Model</i> | Factors                               | Df  | Sum Sq  | Mean Sq | F value  | Pr(>F)    |     |
|----------------------|---------------------------------------|-----|---------|---------|----------|-----------|-----|
|                      | Temperature                           | 1   | 2.02066 | 2.02066 | 259.2496 | < 2.2e-16 | *** |
|                      | PAC strain                            | 3   | 0.19898 | 0.06633 | 8.5098   | 3.89E-05  | *** |
|                      | Mycorrhization                        | 1   | 0.84077 | 0.84077 | 107.8704 | < 2.2e-16 | *** |
|                      | Block                                 | 1   | 0.02822 | 0.02822 | 3.6205   | 0.059662  | .   |
|                      | Temperature:Mycorrhization            | 1   | 0.00878 | 0.00878 | 1.1271   | 0.290703  |     |
|                      | Temperature:PAC strain                | 3   | 0.06369 | 0.02123 | 2.7237   | 0.047705  | *   |
|                      | PAC strain:Mycorrhization             | 3   | 0.13295 | 0.04432 | 5.686    | 0.001168  | **  |
|                      | Temperature:PAC strain:Mycorrhization | 3   | 0.12894 | 0.04298 | 5.5145   | 0.001443  | **  |
|                      | Residuals                             | 111 | 0.86516 | 0.00779 |          |           |     |
