# Supplementary material for: Mycorrhiza Reduces Adverse Effects of Dark Septate Endophytes (DSE) on Growth of Conifers
Source: PubMed Central journal article supplement (PMC3416760; doi:10.1371/journal.pone.0042865), 2012-08-10
Supplement: pone.0042865.s002.pdf [file pone.0042865.s002.pdf]

**Table S2.** Factors in the full and reduced models with root/shoot biomass as response variable. The stepAIC command implemented in R was used to find the reduced models. Values are given for models including both hosts and with the two hosts separately. Significance level  $\leq 0.05$ ; \*\*\*,  $0 \leq p \leq 0.001$ ; \*\*,  $0.001 < p \leq 0.01$ ; \*,  $0.01 < p \leq 0.05$

### Both Hosts

| <i>Full Model</i> | Factors                                          | Df  | Sum Sq | Mean Sq | F value | Pr(>F)        |
|-------------------|--------------------------------------------------|-----|--------|---------|---------|---------------|
|                   | PAC strain                                       | 3   | 1.493  | 0.4977  | 1.5338  | 0.20724       |
|                   | Temperature                                      | 1   | 7.91   | 7.9104  | 24.3806 | 1.766e-06 *** |
|                   | Mycorrhization                                   | 1   | 0.459  | 0.4595  | 1.4161  | 0.23558       |
|                   | Host                                             | 1   | 0.056  | 0.0561  | 0.1729  | 0.67806       |
|                   | Block                                            | 1   | 0.83   | 0.8297  | 2.5571  | 0.11152       |
|                   | PAC strain:Temperature                           | 3   | 1.361  | 0.4535  | 1.3977  | 0.24497       |
|                   | PAC strain:Mycorrhization                        | 3   | 0.805  | 0.2684  | 0.8271  | 0.48047       |
|                   | Temperature:Mycorrhization                       | 1   | 0.258  | 0.2578  | 0.7944  | 0.37393       |
|                   | PAC strain:Host                                  | 3   | 0.609  | 0.2029  | 0.6255  | 0.59941       |
|                   | Temperature:Host                                 | 1   | 0.04   | 0.0404  | 0.1245  | 0.72464       |
|                   | Mycorrhization:Host                              | 1   | 1.761  | 1.7611  | 5.4279  | 0.0209 *      |
|                   | PAC strain:Block                                 | 3   | 1.33   | 0.4433  | 1.3663  | 0.25455       |
|                   | Temperature:Block                                | 1   | 0.027  | 0.0267  | 0.0822  | 0.7746        |
|                   | Mycorrhization:Block                             | 1   | 0.315  | 0.315   | 0.9707  | 0.32579       |
|                   | Host:Block                                       | 1   | 0.069  | 0.0693  | 0.2134  | 0.64462       |
|                   | PAC strain:Temperature:Mycorrhization            | 3   | 0.792  | 0.2641  | 0.8139  | 0.48769       |
|                   | PAC strain:Temperature:Host                      | 3   | 1.342  | 0.4472  | 1.3782  | 0.25087       |
|                   | PAC strain:Mycorrhization:Host                   | 3   | 0.318  | 0.1059  | 0.3265  | 0.8062        |
|                   | Temperature:Mycorrhization:Host                  | 1   | 0.74   | 0.74    | 2.2807  | 0.1327        |
|                   | PAC strain:Temperature:Block                     | 3   | 0.475  | 0.1582  | 0.4877  | 0.69123       |
|                   | PAC strain:Mycorrhization:Block                  | 3   | 0.388  | 0.1293  | 0.3985  | 0.75423       |
|                   | Temperature:Mycorrhization:Block                 | 1   | 0.008  | 0.0076  | 0.0233  | 0.87892       |
|                   | PAC strain:Host:Block                            | 3   | 0.382  | 0.1275  | 0.3929  | 0.75825       |
|                   | Temperature:Host:Block                           | 1   | 0.368  | 0.3677  | 1.1332  | 0.28849       |
|                   | Mycorrhization:Host:Block                        | 1   | 0.001  | 0.0006  | 0.0019  | 0.96499       |
|                   | PAC strain:Temperature:Mycorrhization:Host       | 3   | 0.753  | 0.251   | 0.7735  | 0.51019       |
|                   | PAC strain:Temperature:Mycorrhization:Block      | 3   | 0.31   | 0.1033  | 0.3183  | 0.81215       |
|                   | PAC strain:Temperature:Host:Block                | 3   | 1.209  | 0.403   | 1.2421  | 0.29585       |
|                   | PAC strain:Mycorrhization:Host:Block             | 3   | 1.063  | 0.3544  | 1.0923  | 0.35369       |
|                   | Temperature:Mycorrhization:Host:Block            | 1   | 0.018  | 0.0182  | 0.0562  | 0.81283       |
|                   | PAC strain:Temperature:Mycorrhization:Host:Block | 3   | 0.298  | 0.0995  | 0.3066  | 0.82059       |
|                   | Residuals                                        | 184 | 59.7   | 0.3245  |         |               |

  

| <i>Reduced Model</i> | Factors                         | Df  | Sum Sq | Mean Sq | F value | Pr(>F)       |
|----------------------|---------------------------------|-----|--------|---------|---------|--------------|
|                      | Temperature                     | 1   | 7.953  | 7.9528  | 25.9325 | 7.17E-07 *** |
|                      | Mycorrhization                  | 1   | 0.47   | 0.4697  | 1.5316  | 2.17E-01     |
|                      | Host                            | 1   | 0.06   | 0.0598  | 0.195   | 0.65919      |
|                      | Block                           | 1   | 0.898  | 0.8979  | 2.928   | 0.08835 .    |
|                      | Temperature:Mycorrhization      | 1   | 0.25   | 0.2498  | 0.8146  | 0.36767      |
|                      | Temperature:Host                | 1   | 0.035  | 0.0347  | 0.1131  | 0.73691      |
|                      | Mycorrhization:Host             | 1   | 1.718  | 1.7184  | 5.6034  | 0.01872 *    |
|                      | Temperature:Mycorrhization:Host | 1   | 0.81   | 0.8096  | 2.64    | 0.10552      |
|                      | Residuals                       | 239 | 73.294 | 0.3067  |         |              |

## Douglas-fir

| <i>Full Model</i> | <b>Factors</b>                              | <b>Df</b> | <b>Sum Sq</b> | <b>Mean Sq</b> | <b>F value</b> | <b>Pr(&gt;F)</b> |
|-------------------|---------------------------------------------|-----------|---------------|----------------|----------------|------------------|
|                   | PAC strain                                  | 3         | 0.6409        | 0.21362        | 2.3328         | 0.07954 .        |
|                   | Mycorrhization                              | 1         | 0.3877        | 0.38774        | 4.2342         | 0.04258 *        |
|                   | Temperature                                 | 1         | 3.0807        | 3.08075        | 33.6425        | 1.02E-07 ***     |
|                   | Block                                       | 1         | 0.1647        | 0.16472        | 1.7988         | 0.18331          |
|                   | PAC strain:Mycorrhization                   | 3         | 0.0576        | 0.01918        | 0.2095         | 0.88958          |
|                   | PAC strain:Temperature                      | 3         | 0.375         | 0.125          | 1.3651         | 0.25874          |
|                   | Mycorrhization:Temperature                  | 1         | 0.0484        | 0.04837        | 0.5282         | 0.4693           |
|                   | PAC strain:Block                            | 3         | 0.2405        | 0.08018        | 0.8755         | 0.457            |
|                   | Mycorrhization:Block                        | 1         | 0.1556        | 0.15559        | 1.6991         | 0.19581          |
|                   | Temperature:Block                           | 1         | 0.2758        | 0.27579        | 3.0117         | 0.08617 .        |
|                   | PAC strain:Mycorrhization:Temperature       | 3         | 0.1771        | 0.05903        | 0.6446         | 0.58839          |
|                   | PAC strain:Mycorrhization:Block             | 3         | 0.2319        | 0.07731        | 0.8442         | 0.47331          |
|                   | PAC strain:Temperature:Block                | 3         | 0.1672        | 0.05572        | 0.6085         | 0.61122          |
|                   | Mycorrhization:Temperature:Block            | 1         | 0             | 0.00003        | 0.0003         | 0.98533          |
|                   | PAC strain:Mycorrhization:Temperature:Block | 3         | 0.1765        | 0.05884        | 0.6426         | 0.58967          |
|                   | Residuals                                   | 88        | 8.0584        | 0.09157        |                |                  |

| <i>Reduced Model</i> | <b>Factors</b>    | <b>Df</b> | <b>Sum Sq</b> | <b>Mean Sq</b> | <b>F value</b> | <b>Pr(&gt;F)</b> |
|----------------------|-------------------|-----------|---------------|----------------|----------------|------------------|
|                      | PAC strain        | 3         | 0.6409        | 0.21362        | 2.4766         | 0.06505 .        |
|                      | Mycorrhization    | 1         | 0.3877        | 0.38774        | 4.4952         | 0.0362 *         |
|                      | Temperature       | 1         | 3.0807        | 3.08075        | 35.7166        | 2.76E-08 ***     |
|                      | Block             | 1         | 0.1647        | 0.16472        | 1.9097         | 0.16975          |
|                      | Temperature:Block | 1         | 0.3034        | 0.30343        | 3.5178         | 0.06332 .        |
|                      | Residuals         | 112       | 9.6606        | 0.08626        |                |                  |

## Picea

| <i>Full Model</i> | <b>Factors</b>                              | <b>Df</b> | <b>Sum Sq</b> | <b>Mean Sq</b> | <b>F value</b> | <b>Pr(&gt;F)</b> |
|-------------------|---------------------------------------------|-----------|---------------|----------------|----------------|------------------|
|                   | Temperature                                 | 1         | 4.739         | 4.7395         | 8.8106         | 0.003781 **      |
|                   | PAC strain                                  | 3         | 1.355         | 0.4516         | 0.8396         | 0.475441         |
|                   | Mycorrhization                              | 1         | 1.992         | 1.992          | 3.703          | 0.057277 .       |
|                   | Block                                       | 1         | 0.683         | 0.683          | 1.2697         | 0.262625         |
|                   | Temperature:PAC strain                      | 3         | 2.444         | 0.8147         | 1.5146         | 0.215663         |
|                   | Temperature:Mycorrhization                  | 1         | 1.057         | 1.0567         | 1.9644         | 0.16427          |
|                   | PAC strain:Mycorrhization                   | 3         | 1.042         | 0.3474         | 0.6458         | 0.587458         |
|                   | Temperature:Block                           | 1         | 0.133         | 0.1329         | 0.247          | 0.620331         |
|                   | PAC strain:Block                            | 3         | 1.268         | 0.4227         | 0.7858         | 0.504698         |
|                   | Mycorrhization:Block                        | 1         | 0.217         | 0.2171         | 0.4037         | 0.52671          |
|                   | Temperature:PAC strain:Mycorrhization       | 3         | 1.538         | 0.5127         | 0.9531         | 0.418255         |
|                   | Temperature:PAC strain:Block                | 3         | 1.504         | 0.5014         | 0.9321         | 0.428377         |
|                   | Temperature:Mycorrhization:Block            | 1         | 0.041         | 0.0414         | 0.0769         | 0.782179         |
|                   | PAC strain:Mycorrhization:Block             | 3         | 1.038         | 0.3461         | 0.6434         | 0.588948         |
|                   | Temperature:PAC strain:Mycorrhization:Block | 3         | 0.539         | 0.1796         | 0.3338         | 0.800928         |
|                   | Residuals                                   | 96        | 51.642        | 0.5379         |                |                  |

| <i>Reduced Model</i> | <b>Factors</b>             | <b>Df</b> | <b>Sum Sq</b> | <b>Mean Sq</b> | <b>F value</b> | <b>Pr(&gt;F)</b> |
|----------------------|----------------------------|-----------|---------------|----------------|----------------|------------------|
|                      | Temperature                | 1         | 4.739         | 4.7395         | 9.2559         | 0.002866 **      |
|                      | Mycorrhization             | 1         | 1.992         | 1.992          | 3.8902         | 0.050795 .       |
|                      | Temperature:Mycorrhization | 1         | 1.007         | 1.0073         | 1.9672         | 0.163241         |
|                      | Residuals                  | 124       | 63.494        | 0.5121         |                |                  |
