# Supplementary material for: Mycorrhiza Reduces Adverse Effects of Dark Septate Endophytes (DSE) on Growth of Conifers
Source: PubMed Central journal article supplement (PMC3416760; doi:10.1371/journal.pone.0042865), 2012-08-10
Supplement: pone.0042865.s003.pdf [file pone.0042865.s003.pdf]

**Table S3.** Factors in the full and reduced models with fungal biomass as response variable. The stepAIC command implemented in R was used to find the reduced models. Values are given for models with the two hosts combined as well as for each host separately. Significance level  $\leq 0.05$ ; \*\*\*,  $0 \leq p \leq 0.001$ ; \*\*,  $0.001 < p \leq 0.01$ ; \*,  $0.01 < p \leq 0.05$

**Both Hosts**

| <i>Full Model</i> | <b>Factors</b>                                   | <b>Df</b> | <b>Sum Sq</b> | <b>Mean Sq</b> | <b>F value</b> | <b>Pr(&gt;F)</b> |
|-------------------|--------------------------------------------------|-----------|---------------|----------------|----------------|------------------|
|                   | PAC strain                                       | 4         | 0.0012054     | 0.0003014      | 14.5345        | 1.38E-07 ***     |
|                   | Temperature                                      | 1         | 0.0001496     | 0.0001496      | 7.2161         | 0.0102279 *      |
|                   | Mycorrhization                                   | 1         | 0.0007649     | 0.0007649      | 36.8897        | 2.86E-07 ***     |
|                   | Host                                             | 1         | 0.0009024     | 0.0009024      | 43.5251        | 4.94E-08 ***     |
|                   | Block                                            | 1         | 0.0002906     | 0.0002906      | 14.014         | 0.0005339 ***    |
|                   | PAC strain:Temperature                           | 4         | 0.0001002     | 2.505E-05      | 1.2081         | 0.3212878        |
|                   | PAC strain:Mycorrhization                        | 4         | 0.0002317     | 5.792E-05      | 2.7936         | 0.0378574 *      |
|                   | Temperature:Mycorrhization                       | 1         | 0.0001457     | 0.0001457      | 7.0262         | 0.011198 *       |
|                   | PAC strain:Host                                  | 4         | 0.0004006     | 0.0001002      | 4.8303         | 0.002627 **      |
|                   | Temperature:Host                                 | 1         | 0.0002606     | 0.0002606      | 12.5703        | 0.0009603 ***    |
|                   | Mycorrhization:Host                              | 1         | 0.0001221     | 0.0001221      | 5.8888         | 0.0195025 *      |
|                   | PAC strain:Block                                 | 4         | 5.728E-05     | 1.432E-05      | 0.6907         | 0.602417         |
|                   | Temperature:Block                                | 1         | 2.304E-05     | 2.304E-05      | 1.1112         | 0.2977064        |
|                   | Mycorrhization:Block                             | 1         | 4.699E-05     | 4.699E-05      | 2.2666         | 0.1395027        |
|                   | Host:Block                                       | 1         | 5.028E-05     | 5.028E-05      | 2.4252         | 0.1267253        |
|                   | PAC strain:Temperature:Mycorrhization            | 4         | 0.0001105     | 2.762E-05      | 1.3322         | 0.2734162        |
|                   | PAC strain:Temperature:Host                      | 4         | 0.0002395     | 5.988E-05      | 2.8879         | 0.0333211 *      |
|                   | PAC strain:Mycorrhization:Host                   | 4         | 8.778E-05     | 2.195E-05      | 1.0585         | 0.3886643        |
|                   | Temperature:Mycorrhization:Host                  | 1         | 0.0001548     | 0.0001548      | 7.4665         | 0.0090842 **     |
|                   | PAC strain:Temperature:Block                     | 4         | 0.0000748     | 0.0000187      | 0.9019         | 0.4713059        |
|                   | PAC strain:Mycorrhization:Block                  | 4         | 4.431E-05     | 1.108E-05      | 0.5343         | 0.7112155        |
|                   | Temperature:Mycorrhization:Block                 | 1         | 1.804E-05     | 1.804E-05      | 0.8701         | 0.3561246        |
|                   | PAC strain:Host:Block                            | 4         | 2.284E-05     | 5.71E-06       | 0.2754         | 0.8922574        |
|                   | Temperature:Host:Block                           | 1         | 7E-08         | 7E-08          | 0.0036         | 0.952523         |
|                   | Mycorrhization:Host:Block                        | 1         | 1.241E-05     | 1.241E-05      | 0.5984         | 0.4434263        |
|                   | PAC strain:Temperature:Mycorrhization:Host       | 4         | 0.0002024     | 5.059E-05      | 2.4401         | 0.0612299 .      |
|                   | PAC strain:Temperature:Mycorrhization:Block      | 4         | 3.881E-05     | 0.0000097      | 0.468          | 0.7588823        |
|                   | PAC strain:Temperature:Host:Block                | 4         | 5.26E-06      | 1.32E-06       | 0.0634         | 0.9923168        |
|                   | PAC strain:Mycorrhization:Host:Block             | 3         | 0.0002457     | 8.191E-05      | 3.9506         | 0.0141904 *      |
|                   | Temperature:Mycorrhization:Host:Block            | 1         | 1.012E-05     | 1.012E-05      | 0.4882         | 0.4884979        |
|                   | PAC strain:Temperature:Mycorrhization:Host:Block | 2         | 7.471E-05     | 3.735E-05      | 1.8017         | 0.1772578        |
|                   | Residuals                                        | 43        | 0.0008915     | 2.073E-05      |                |                  |

**Reduced Model** This model corresponds to the full model for both hosts; no reduction possible using the stepAIC command implemented in the statistic package 'R'

**Douglas-Fir**

| <i>Full Model</i> | <b>Factors</b>                              | <b>Df</b> | <b>Sum Sq</b> | <b>Mean Sq</b> | <b>F value</b> | <b>Pr(&gt;F)</b> |
|-------------------|---------------------------------------------|-----------|---------------|----------------|----------------|------------------|
|                   | PAC strain                                  | 4         | 0.0013843     | 0.0003461      | 10.5863        | 6.15E-05 ***     |
|                   | Temperature                                 | 1         | 0.0004275     | 0.0004275      | 13.0769        | 0.001531 **      |
|                   | Mycorrhization                              | 1         | 0.0008442     | 0.0008442      | 25.8227        | 4.33E-05 ***     |
|                   | Block                                       | 1         | 0.0002901     | 0.0002901      | 8.8731         | 0.006927 **      |
|                   | PAC strain:Temperature                      | 4         | 0.0003246     | 8.114E-05      | 2.4819         | 0.073501 .       |
|                   | PAC strain:Mycorrhization                   | 4         | 0.0002266     | 5.664E-05      | 1.7325         | 0.17877          |
|                   | Temperature:Mycorrhization                  | 1         | 0.0002949     | 0.0002949      | 9.0211         | 0.006541 **      |
|                   | PAC strain:Block                            | 4         | 5.608E-05     | 1.402E-05      | 0.4288         | 0.78623          |
|                   | Temperature:Block                           | 1         | 9.83E-06      | 9.83E-06       | 0.3007         | 0.588984         |
|                   | Mycorrhization:Block                        | 1         | 0.0000011     | 0.0000011      | 0.0337         | 0.856044         |
|                   | PAC strain:Temperature:Mycorrhization       | 4         | 0.0002762     | 6.906E-05      | 2.1123         | 0.1135           |
|                   | PAC strain:Temperature:Block                | 4         | 5.027E-05     | 1.257E-05      | 0.3844         | 0.817397         |
|                   | PAC strain:Mycorrhization:Block             | 3         | 0.0002428     | 8.094E-05      | 2.4759         | 0.088137 .       |
|                   | Temperature:Mycorrhization:Block            | 1         | 1.55E-06      | 1.55E-06       | 0.0474         | 0.829655         |
|                   | PAC strain:Temperature:Mycorrhization:Block | 3         | 6.158E-05     | 2.053E-05      | 0.6279         | 0.604681         |
|                   | Residuals                                   | 22        | 0.0007192     | 3.269E-05      |                |                  |

| <i>Reduced Model</i> | <b>Factors</b>                        | <b>Df</b> | <b>Sum Sq</b> | <b>Mean Sq</b> | <b>F value</b> | <b>Pr(&gt;F)</b> |
|----------------------|---------------------------------------|-----------|---------------|----------------|----------------|------------------|
|                      | PAC strain                            | 4         | 0.0013843     | 0.0003461      | 12.4698        | 4.33E-06 ***     |
|                      | Temperature                           | 1         | 0.0004275     | 0.0004275      | 15.4035        | 0.0004694 ***    |
|                      | Mycorrhization                        | 1         | 0.0008442     | 0.0008442      | 30.417         | 5.44E-06 ***     |
|                      | Block                                 | 1         | 0.0002901     | 0.0002901      | 10.4518        | 0.0029747 **     |
|                      | PAC strain:Temperature                | 4         | 0.0003246     | 8.114E-05      | 2.9234         | 0.0373547 *      |
|                      | PAC strain:Mycorrhization             | 4         | 0.0002266     | 5.664E-05      | 2.0408         | 0.1138363        |
|                      | Temperature:Mycorrhization            | 1         | 0.0002949     | 0.0002949      | 10.6261        | 0.0027749 **     |
|                      | PAC strain:Block                      | 4         | 5.608E-05     | 1.402E-05      | 0.5051         | 0.732244         |
|                      | Temperature:Block                     | 1         | 9.83E-06      | 9.83E-06       | 0.3542         | 0.5562277        |
|                      | Mycorrhization:Block                  | 1         | 0.0000011     | 0.0000011      | 0.0397         | 0.8434388        |
|                      | PAC strain:Temperature:Mycorrhization | 4         | 0.0002762     | 6.906E-05      | 2.4882         | 0.0644322 .      |
|                      | PAC strain:Mycorrhization:Block       | 3         | 0.0002428     | 8.094E-05      | 2.9165         | 0.0503087 .      |
|                      | Residuals                             | 30        | 0.0008326     | 2.775E-05      |                |                  |

**Picea**

| <i>Full Model</i> | <b>Factors</b>                              | <b>Df</b> | <b>Sum Sq</b> | <b>Mean Sq</b> | <b>F value</b> | <b>Pr(&gt;F)</b> |
|-------------------|---------------------------------------------|-----------|---------------|----------------|----------------|------------------|
|                   | PAC strain                                  | 4         | 1.71E-04      | 4.27E-05       | 5.2032         | 0.004506 **      |
|                   | Temperature                                 | 1         | 1.14E-05      | 1.14E-05       | 1.3906         | 0.251486         |
|                   | Mycorrhization                              | 1         | 1.01E-04      | 1.01E-04       | 12.3248        | 0.002079 **      |
|                   | Block                                       | 1         | 3.15E-05      | 3.15E-05       | 3.8395         | 0.063467 .       |
|                   | PAC strain:Temperature                      | 4         | 2.72E-05      | 6.79E-06       | 0.8274         | 0.52259          |
|                   | PAC strain:Mycorrhization                   | 4         | 9.21E-05      | 2.30E-05       | 2.8072         | 0.051878 .       |
|                   | Temperature:Mycorrhization                  | 1         | 0.00E+00      | 0.00E+00       | 0.0001         | 0.994179         |
|                   | PAC strain:Block                            | 4         | 2.41E-05      | 6.04E-06       | 0.7357         | 0.577958         |
|                   | Temperature:Block                           | 1         | 1.46E-05      | 1.46E-05       | 1.7827         | 0.196116         |
|                   | Mycorrhization:Block                        | 1         | 2.87E-05      | 2.87E-05       | 3.4917         | 0.075692 .       |
|                   | PAC strain:Temperature:Mycorrhization       | 4         | 5.08E-05      | 1.27E-05       | 1.5473         | 0.225081         |
|                   | PAC strain:Temperature:Block                | 4         | 2.56E-05      | 6.39E-06       | 0.7787         | 0.551505         |
|                   | PAC strain:Mycorrhization:Block             | 4         | 6.63E-05      | 1.66E-05       | 2.0185         | 0.12863          |
|                   | Temperature:Mycorrhization:Block            | 1         | 2.82E-05      | 2.82E-05       | 3.4345         | 0.077953 .       |
|                   | PAC strain:Temperature:Mycorrhization:Block | 3         | 2.70E-05      | 9.01E-06       | 1.0975         | 0.372154         |
|                   | Residuals                                   | 21        | 1.72E-04      | 8.21E-06       |                |                  |

| <i>Reduced Model</i> | <b>Factors</b>                               | <b>Df</b> | <b>Sum Sq</b> | <b>Mean Sq</b> | <b>F value</b> | <b>Pr(&gt;F)</b> |
|----------------------|----------------------------------------------|-----------|---------------|----------------|----------------|------------------|
|                      | PAC strain                                   | 4         | 1.71E-04      | 4.27E-05       | 5.2032         | 0.004506 **      |
|                      | Temperature                                  | 1         | 1.14E-05      | 1.14E-05       | 1.3906         | 0.251486         |
|                      | Mycorrhization                               | 1         | 1.01E-04      | 1.01E-04       | 12.3248        | 0.002079 **      |
|                      | Block                                        | 1         | 3.15E-05      | 3.15E-05       | 3.8395         | 0.063467 .       |
|                      | PAC strain:Temperature                       | 4         | 2.72E-05      | 6.79E-06       | 0.8274         | 0.52259          |
|                      | PAC strain:Mycorrhization                    | 4         | 9.21E-05      | 2.30E-05       | 2.8072         | 0.051878 .       |
|                      | Temperature:Mycorrhization                   | 1         | 0.00E+00      | 0.00E+00       | 0.0001         | 0.994179         |
|                      | PAC strain:Block                             | 4         | 2.41E-05      | 6.04E-06       | 0.7357         | 0.577958         |
|                      | Temperature:Block                            | 1         | 1.46E-05      | 1.46E-05       | 1.7827         | 0.196116         |
|                      | Mycorrhization:Block                         | 1         | 2.87E-05      | 2.87E-05       | 3.4917         | 0.075692 .       |
|                      | PAC strain:Temperature:Mycorrhization        | 4         | 5.08E-05      | 1.27E-05       | 1.5473         | 0.225081         |
|                      | PAC strain:Temperature:Block                 | 4         | 2.56E-05      | 6.39E-06       | 0.7787         | 0.551505         |
|                      | PAC strain:Mycorrhization:Block              | 4         | 6.63E-05      | 1.66E-05       | 2.0185         | 0.12863          |
|                      | Temperature:Mycorrhization:Block             | 1         | 2.82E-05      | 2.82E-05       | 3.4345         | 0.077953 .       |
|                      | PAC strain:Temperature]:Mycorrhization:Block | 3         | 2.70E-05      | 9.01E-06       | 1.0975         | 0.372154         |
|                      | Residuals                                    | 21        | 1.72E-04      | 8.21E-06       |                |                  |
