# Supplementary material for: Mycorrhiza Reduces Adverse Effects of Dark Septate Endophytes (DSE) on Growth of Conifers
Source: PubMed Central journal article supplement (PMC3416760; doi:10.1371/journal.pone.0042865), 2012-08-10
Supplement: pone.0042865.s004.pdf [file pone.0042865.s004.pdf]

**Table S4.** Factors in the full and reduced models with mycorrhization as response variable. The stepAIC command implemented in R was used to find the reduced models. Values are given for models with the two hosts combined as well as for each host separately. Significance level  $\leq 0.05$ ; \*\*\*,  $0 \leq p \leq 0.001$ ; \*\*,  $0.001 < p \leq 0.01$ ; \*,  $0.01 < p \leq 0.05$

### Both Hosts

| <i>Full Model</i> | <b>Factors</b>               | <b>Df</b> | <b>Sum Sq</b> | <b>Mean Sq</b> | <b>F value</b> | <b>Pr(&gt;F)</b> |
|-------------------|------------------------------|-----------|---------------|----------------|----------------|------------------|
|                   | PAC strain                   | 4         | 0.71          | 0.1771         | 0.1471         | 0.9641855        |
|                   | Temperature                  | 1         | 31.15         | 31.1529        | 25.8725        | 6.82E-07 ***     |
|                   | Block                        | 1         | 16.71         | 16.7115        | 13.8789        | 0.0002373 ***    |
|                   | Host                         | 1         | 0.23          | 0.2321         | 0.1928         | 0.6609801        |
|                   | PAC strain:Temperature       | 4         | 1.13          | 0.2813         | 0.2336         | 0.9192941        |
|                   | PAC strain:Block             | 4         | 0.58          | 0.1458         | 0.1211         | 0.974871         |
|                   | Temperature:Block            | 1         | 19.09         | 19.0882        | 15.8528        | 8.80E-05 ***     |
|                   | PAC strain:Host              | 4         | 1.35          | 0.3378         | 0.2806         | 0.890443         |
|                   | Temperature:Host             | 1         | 0.05          | 0.0508         | 0.0422         | 0.8373804        |
|                   | Block:Host                   | 1         | 1.09          | 1.0915         | 0.9065         | 0.3419002        |
|                   | PAC strain:Temperature:Block | 4         | 0.06          | 0.0151         | 0.0125         | 0.9996896        |
|                   | PAC strain:Temperature:Host  | 4         | 0.76          | 0.1907         | 0.1583         | 0.9591014        |
|                   | PAC strain:Block:Host        | 4         | 1.36          | 0.3409         | 0.2831         | 0.8888097        |
|                   | Temperature:Block:Host       | 1         | 0.55          | 0.5511         | 0.4577         | 0.4992826        |
|                   | Residuals                    | 271       | 326.31        | 1.2041         |                |                  |

| <i>Reduced Model</i> | <b>Factors</b>    | <b>Df</b> | <b>Sum Sq</b> | <b>Mean Sq</b> | <b>F value</b> | <b>Pr(&gt;F)</b> |
|----------------------|-------------------|-----------|---------------|----------------|----------------|------------------|
|                      | Temperature       | 1         | 3.12E+01      | 31.1834        | 28.444         | 1.88E-07 ***     |
|                      | Block             | 1         | 16.43         | 16.4318        | 14.988         | 0.0001322 ***    |
|                      | Temperature:Block | 1         | 1.84E+01      | 18.4401        | 16.82          | 5.27E-05 ***     |
|                      | Residuals         | 156       | 1.49E+02      | 0.9538         |                |                  |

### Douglas-Fir

| <i>Full Model</i> | <b>Factors</b>               | <b>Df</b> | <b>Sum Sq</b> | <b>Mean Sq</b> | <b>F value</b> | <b>Pr(&gt;F)</b> |
|-------------------|------------------------------|-----------|---------------|----------------|----------------|------------------|
|                   | PAC strain                   | 4         | 1.82          | 0.4549         | 0.3272         | 0.85931          |
|                   | Temperature                  | 1         | 15.454        | 15.4541        | 11.1146        | 0.001114 **      |
|                   | Block                        | 1         | 3.941         | 3.9406         | 2.8341         | 0.094665 .       |
|                   | PAC strain:Temperature       | 4         | 1.023         | 0.2558         | 0.184          | 0.946375         |
|                   | PAC strain:Block             | 4         | 1.306         | 0.3266         | 0.2349         | 0.918283         |
|                   | Temperature:Block            | 1         | 5.892         | 5.8918         | 4.2374         | 0.041525 *       |
|                   | PAC strain:Temperature:Block | 4         | 0.603         | 0.1508         | 0.1085         | 0.979383         |
|                   | Residuals                    | 131       | 182.146       | 1.3904         |                |                  |

| <i>Reduced Model</i> | <b>Factors</b> | <b>Df</b> | <b>Sum Sq</b> | <b>Mean Sq</b> | <b>F value</b> | <b>Pr(&gt;F)</b> |
|----------------------|----------------|-----------|---------------|----------------|----------------|------------------|
|                      | Temperature    | 1         | 15.678        | 15.6782        | 12.065         | 0.0006742 ***    |
|                      | Block          | 1         | 4.177         | 4.1767         | 3.214          | 0.0750523 .      |
|                      | Residuals      | 148       | 192.331       | 1.2995         |                |                  |

## Picea

| <i>Full Model</i> | <b>Factors</b>               | <b>Df</b> | <b>Sum Sq</b> | <b>Mean Sq</b> | <b>F value</b> | <b>Pr(&gt;F)</b> |
|-------------------|------------------------------|-----------|---------------|----------------|----------------|------------------|
|                   | PAC strain                   | 4         | 1.063         | 0.2656         | 0.258          | 0.9043894        |
|                   | Temperature                  | 1         | 15.625        | 15.625         | 15.1738        | 0.0001513 ***    |
|                   | Block                        | 1         | 13.715        | 13.7155        | 13.3195        | 0.0003699 ***    |
|                   | PAC strain:Temperature       | 4         | 1.262         | 0.3155         | 0.3064         | 0.8733209        |
|                   | PAC strain:Block             | 4         | 0.74          | 0.1849         | 0.1796         | 0.9486547        |
|                   | Temperature:Block            | 1         | 12.886        | 12.8865        | 12.5144        | 0.0005483 ***    |
|                   | PAC strain:Temperature:Block | 4         | 0.921         | 0.2303         | 0.2237         | 0.9248217        |
|                   | Residuals                    |           |               |                |                |                  |

| <i>Reduced Model</i> | <b>Factors</b>    | <b>Df</b> | <b>Sum Sq</b> | <b>Mean Sq</b> | <b>F value</b> | <b>Pr(&gt;F)</b> |
|----------------------|-------------------|-----------|---------------|----------------|----------------|------------------|
|                      | Temperature       | 1         | 15.625        | 15.625         | 16.382         | 8.13E-05 ***     |
|                      | Block             | 1         | 13.535        | 13.5352        | 14.191         | 0.0002337 ***    |
|                      | Temperature:Block | 1         | 12.42         | 12.4203        | 13.022         | 0.0004142 ***    |
|                      | Residuals         | 156       | 148.795       | 0.9538         |                |                  |
